# Supplementary material
Source: publisher figshare collection journal article supplement (https://acs.figshare.com/ndownloader/files/9432832)
Supplement: Supplementary file 1 [file 9432832]

## **Supporting Information**

for

### **A renewable biomass-derived honeycomb-like aerogel as robust oil absorbent with double way reusability**

Jingxian Jiang, Qinghua Zhang\*, Xiaoli Zhan, and Fengqiu Chen  
Zhejiang Provincial Key Laboratory of Advanced Chemical Engineering Manufacture  
Technology,  
College of Chemical and Biological Engineering, Zhejiang University, Hangzhou  
310027, P. R. China

#### **AUTHOR INFORMATION**

##### **Corresponding Author**

\*E-mail: [qhzhang@zju.edu.cn](mailto:qhzhang@zju.edu.cn).

Tel: +86-571-8795-3382.

Fax: +86-571-8795-1227.

Institute: Zhejiang Provincial Key Laboratory of Advanced Chemical  
Engineering Manufacture Technology, College of Chemical and Biological  
Engineering, Zhejiang University

Address: Zhejiang University, Hangzhou, Zhejiang 310027, PR China

#### **Contents of Supporting Information**

Number of Pages: 7

Number of Schemes: 1

Number of Figures: 4

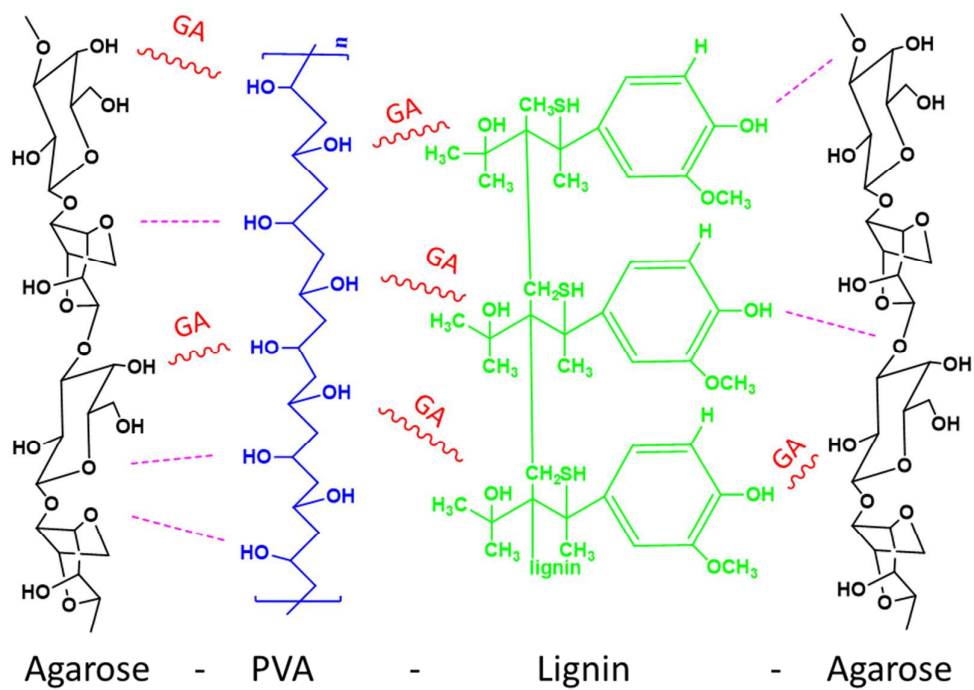

**Scheme S1.** Supposed schematic of cross-linked chemical structure for the biomass-derived aerogel.<sup>1-2</sup> Detailed mechanism still needs to be explored.

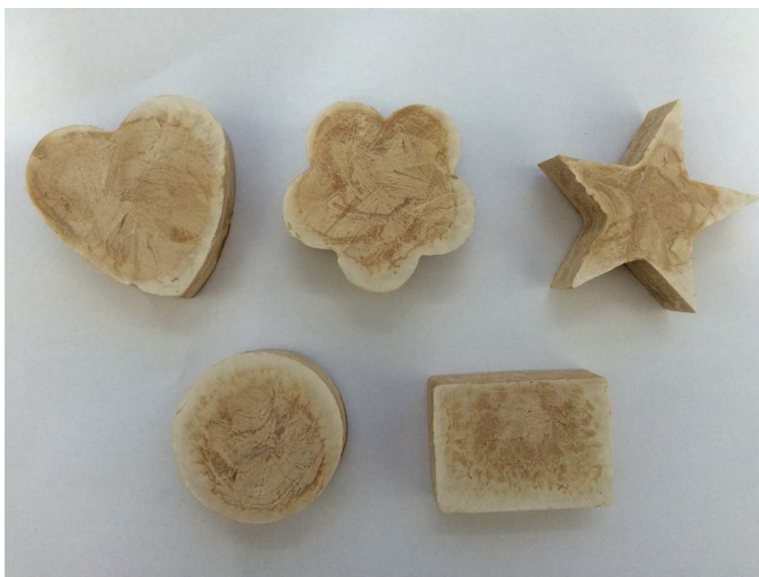

**Figure S1.** Optical image of aerogels with diverse shapes.

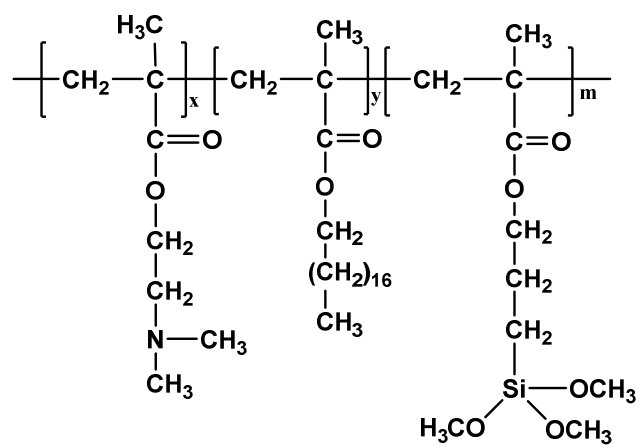

**Figure S2.** Chemical structure of synthesized copolymer p(SMA-DMAEMA-KH570)

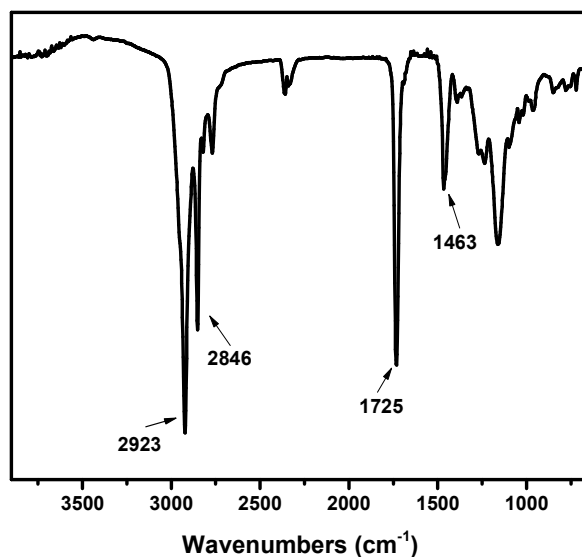

**Figure S3.** FTIR spectrum of synthesized copolymer p(SMA-DMAEMA-KH570)

Figure S3 showed the FTIR spectrum of the synthesized copolymer p(SMA-DMAEMA-KH570). As can be seen from Figure S3, the characteristic peak at around  $1630\text{ cm}^{-1}$  which was attributed to the stretching vibration of  $\text{--C=C--}$  was disappeared, indicating the completely polymerization of reactants. Peaks at  $2923$  and  $2846\text{ cm}^{-1}$  were ascribed to stretching vibrations of  $\text{--CH}_3$  and  $\text{--CH}_2$  groups, which were abundant in the chemical structure of the synthesized copolymer. The appearance of peak at  $1725\text{ cm}^{-1}$  suggested the vibration of the  $\text{C=O}$  bond. And the bands at  $1463\text{ cm}^{-1}$  indicated C-N stretching vibrations, which was belonging to the component of pDMAEMA.

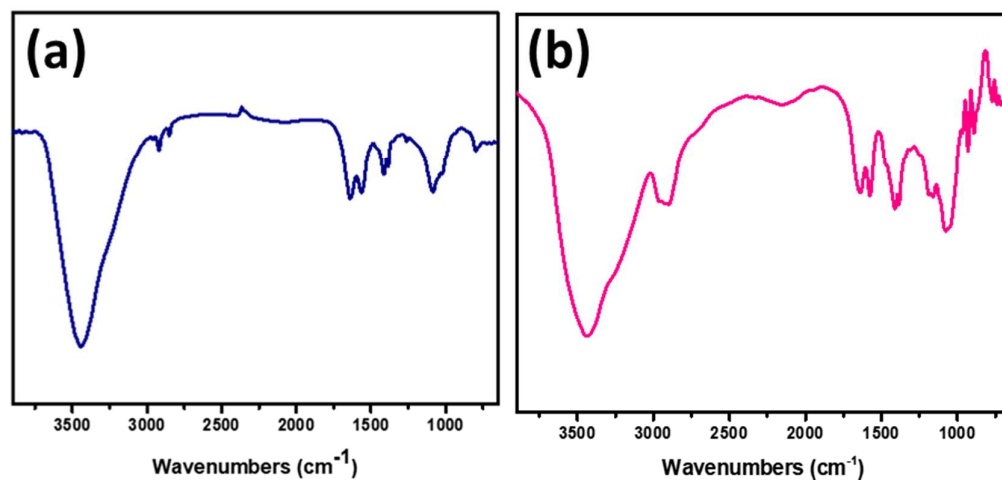

**Figure S4.** FTIR spectra of (a) lignin and (b) agarose

## REFERENCES

1. Chaudhary, J. P.; Nataraj, S. K.; Gogda, A.; Meena, R. Bio-based superhydrophilic foam membranes for sustainable oil – water separation. *Green Chem.* **2014**, *16* (10), 4552-4558.
2. Chaudhary, J. P.; Vadodariya, N.; Nataraj, S. K.; Meena, R. Chitosan-Based Aerogel Membrane for Robust Oil-in-Water Emulsion Separation. *ACS Appl. Mater. Interfaces* **2015**, *7* (44), 24957-24962.
